# Supplementary material
Source: Springer Nature journal article supplement (https://www.springermedizin.de/resource/supplementary/12995_2008_94_MOESM3_ESM.pdf/9622728)

# Physician

 < 36 hours

 37-45 hours

 46-50 hours

**57.1 %  
stress**

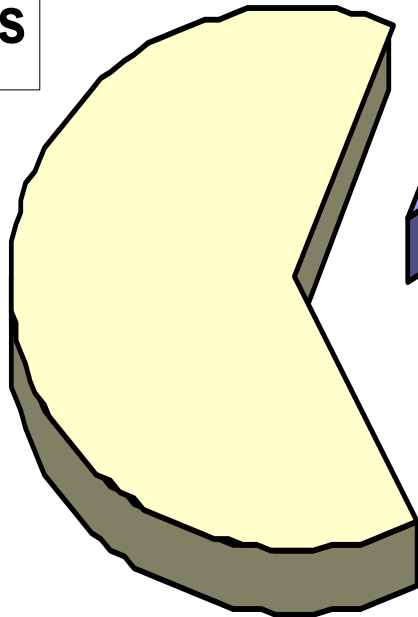

**9.1 % stress**

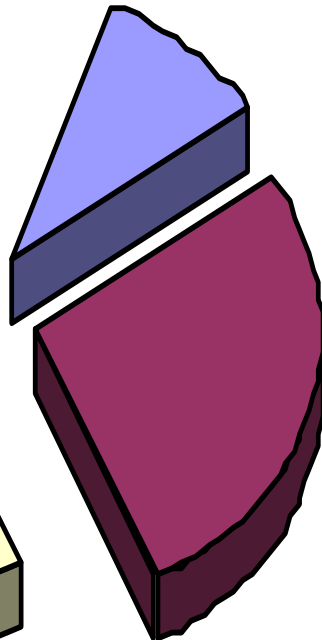

**25.0 %  
stress**

Supplement: MOESM3 [file 9622728]
